# Supplementary material for: Modeling the timing of Patagonian Ice Sheet retreat in the Chilean Lake District from 22–10 ka
Source: Copernicus journal article supplement (doi:10.5194/tc-18-1381-2024), 2024-03-26
Supplement: Supplementary file 1 [file tc-18-1381-2024-supplement.pdf]

Supplement of The Cryosphere, 18, 1381–1398, 2024  
<https://doi.org/10.5194/tc-18-1381-2024-supplement>  
© Author(s) 2024. CC BY 4.0 License.

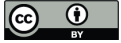

*Supplement of*

## **Modeling the timing of Patagonian Ice Sheet retreat in the Chilean Lake District from 22–10 ka**

**Joshua Cuzzone et al.**

*Correspondence to:* Joshua Cuzzone ([joshua.k.cuzzone@jpl.nasa.gov](mailto:joshua.k.cuzzone@jpl.nasa.gov))

The copyright of individual parts of the supplement might differ from the article licence.

46 **Section 1**

47 **LGM Steady State Ice Temperature**

48 In order to test the validity of our assumption of a largely temperate based ice sheet across this  
49 domain, we calculate ice temperature at the LGM, assuming the ice sheet is in a steady-state  
50 thermal equilibrium following Serrousi et al. (2013). This methodology has been used for  
51 numerous applications in Greenland and Antarctica to calculate the thermal conditions of the ice  
52 sheets (Seroussi et al., 2013; MacGregor et al., 2016; Goelzer et al., 2020; Seroussi et al., 2020).  
53 We use our modeled LGM ice sheet geometry from this analysis to calculate the thermal conditions  
54 of the ice sheet. This formulation, outlined in Seroussi et al. (2013) uses an enthalpy formulation  
55 from Aschwanden et al. (2012) that includes both temperate and cold ice. LGM air temperature is  
56 imposed at the surface and geothermal heat flux is applied at the base ( $100 \text{ mW m}^{-2}$  mean from  
57 Hamza and Vieira, 2018). For this step, we extrude our 2D model to 3D, with the model for the  
58 thermal state calculation having 20 layers.

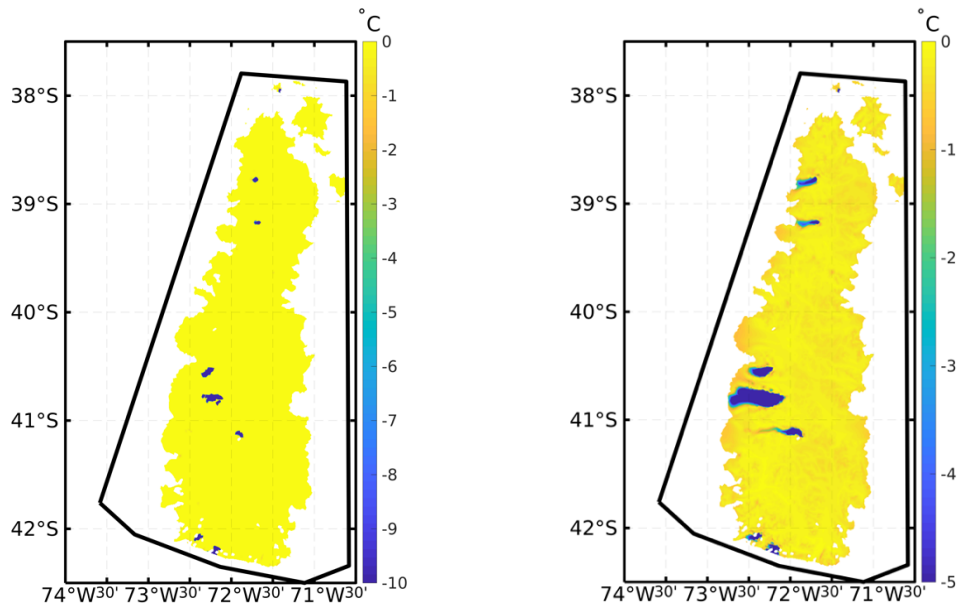

**Figure S1.** Simulated Steady State LGM basal pressure adjusted temperature in degrees Celsius (left panel). Simulated depth averaged ice temperature in degrees Celsius (right panel).

59 Here we show the simulated Steady State Basal Temperatures (Figure S1 left panel) and the  
60 simulated Depth Averaged Steady State temperatures (Figure S1 right panel). The ice sheet is  
61 mainly warm based (figure A) with temperatures near 0 degrees Celsius, with exception for some  
62 of the high peaks where ice cover is thin enough for the colder surface temperatures to diffuse and  
63 advect downward. The depth averaged temperature (figure S1 right panel) shows that the majority  
64 of the ice sheet is between -1 to 0 degrees Celsius, with the mean of the depth averaged temperature  
65 being -0.41 degrees Celsius. There are some exceptions, where colder ice seems to be advected  
66 downstream from the colder based high peaks (in figure S1 left panel), however, we must note that  
67 these simulated temperatures are likely an underestimate as they do not account fully for frictional  
68 heating that would occur If the 3D thermal model was run transiently to steady state. Therefore,

69 this analysis provides some level of confidence in our assumption of a temperate ice sheet across  
70 the CLD.

71

72

## 73 Section 2

### 74 Prescribed GIA forcing

75

76

77

78

79

80

81

82

83

84

85

86

87

88

89

90

91

92

93

94

95

96

97

98

99

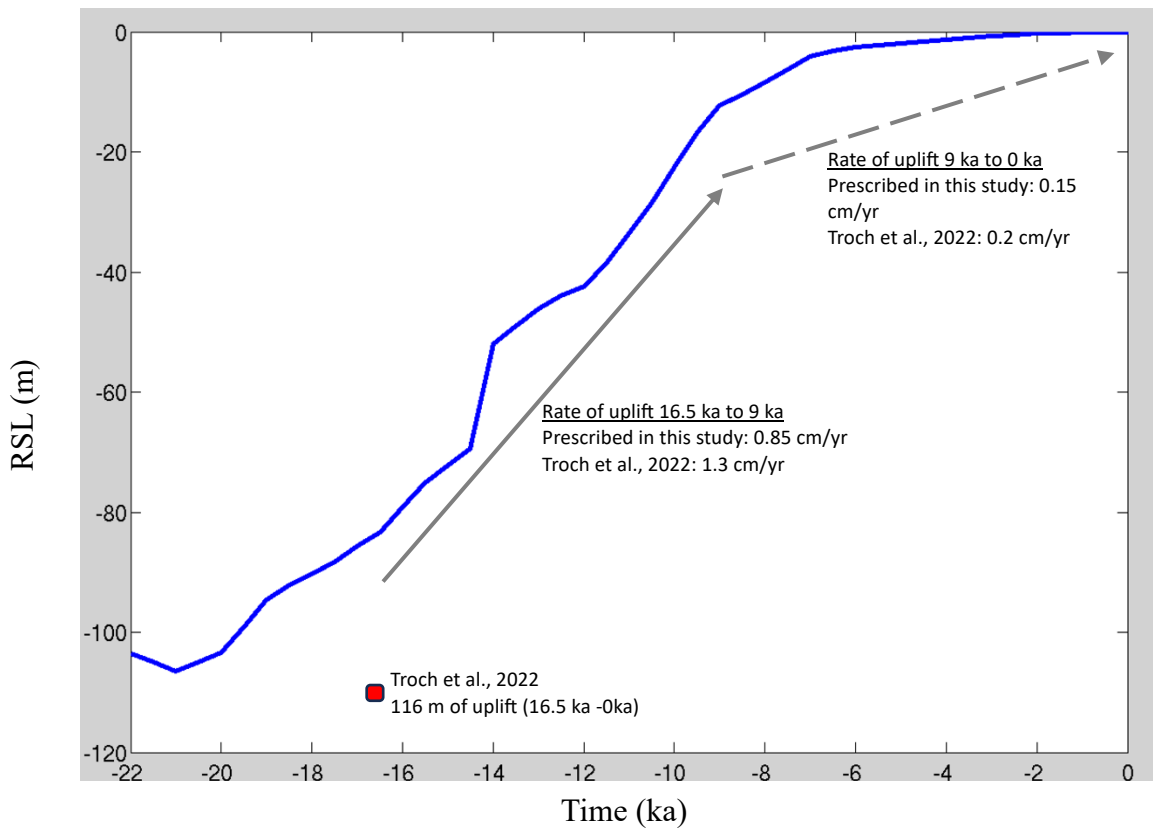

100 **Figure S2:** The time dependent prescribed relative sea level change area averaged across  
101 our model domain. The relative sea-level change consists of 1) Bedrock vertical motion,  
102 2.) Eustatic sea level change, and 3.) Geoid changes from Caron et al., 2018 across the  
103 last deglaciation. For reference, we show the reconstructed total uplift from and isolation  
104 basin in Central Patagonia (Troch et al., 2022; 116m between 16.5 ka and 0ka), and the  
105 associated uplift rates compared against our study (16.5 ka to 9 ka; 9ka to 0 ka).

106

107

108

109

110 **Section 3**  
111 **Wintertime (JJA) 925 hPa zonal wind**

112  
113 **Figure S3 A-E.** First column: The difference in the JJA 925 hPa zonal wind for each  
114 corresponding time period relative to the PI (in m/s). Positive values indicate increased zonal wind  
115 speed and negative values indicate decreased zonal wind speed relative to the PI. The magenta  
116 line is the position of the maximum zonal wind during the PI. The black line is the position of the  
117 maximum zonal wind for the corresponding time period. The red polygon denotes the location of  
118 our model domain. Second column: Zonal mean JJA 925 hPa wind (in m/s) averaged over -85 to  
119 -55 degrees west longitude for the PI and the corresponding time period. Time periods listed are  
120 computed over 500 yr periods (**LGM**: 22ka-21.5ka; **18ka**: 18.5ka-18ka; **16ka**: 16.5ka-16ka; **14ka**:  
121 14.5ka-14ka; **12ka**: 12.5ka-12ka).

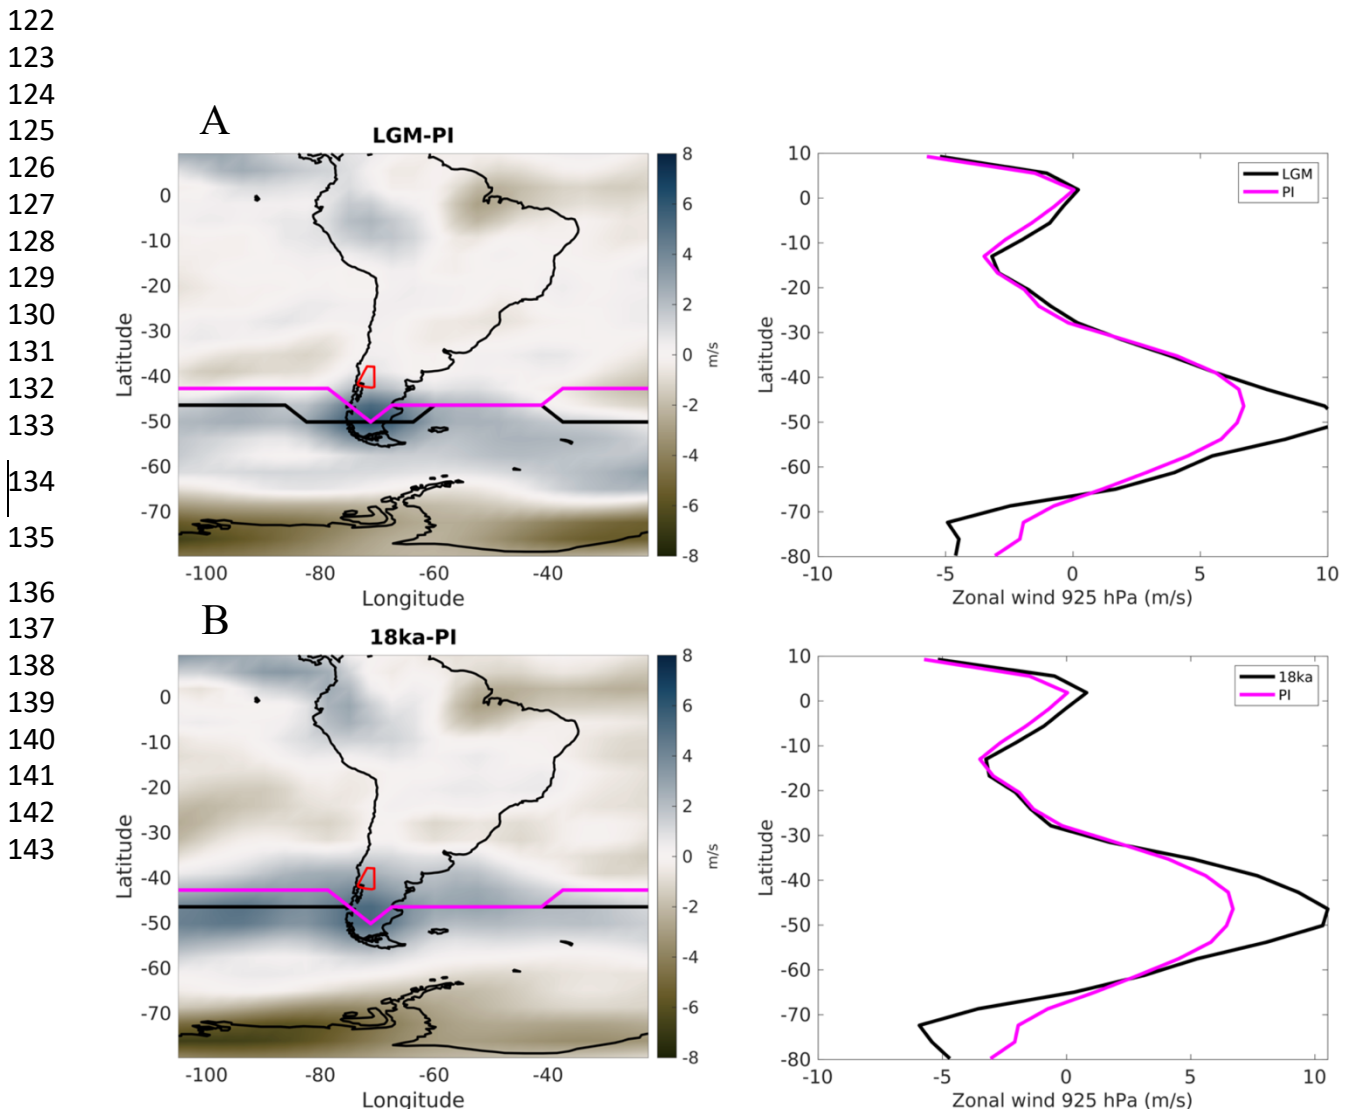

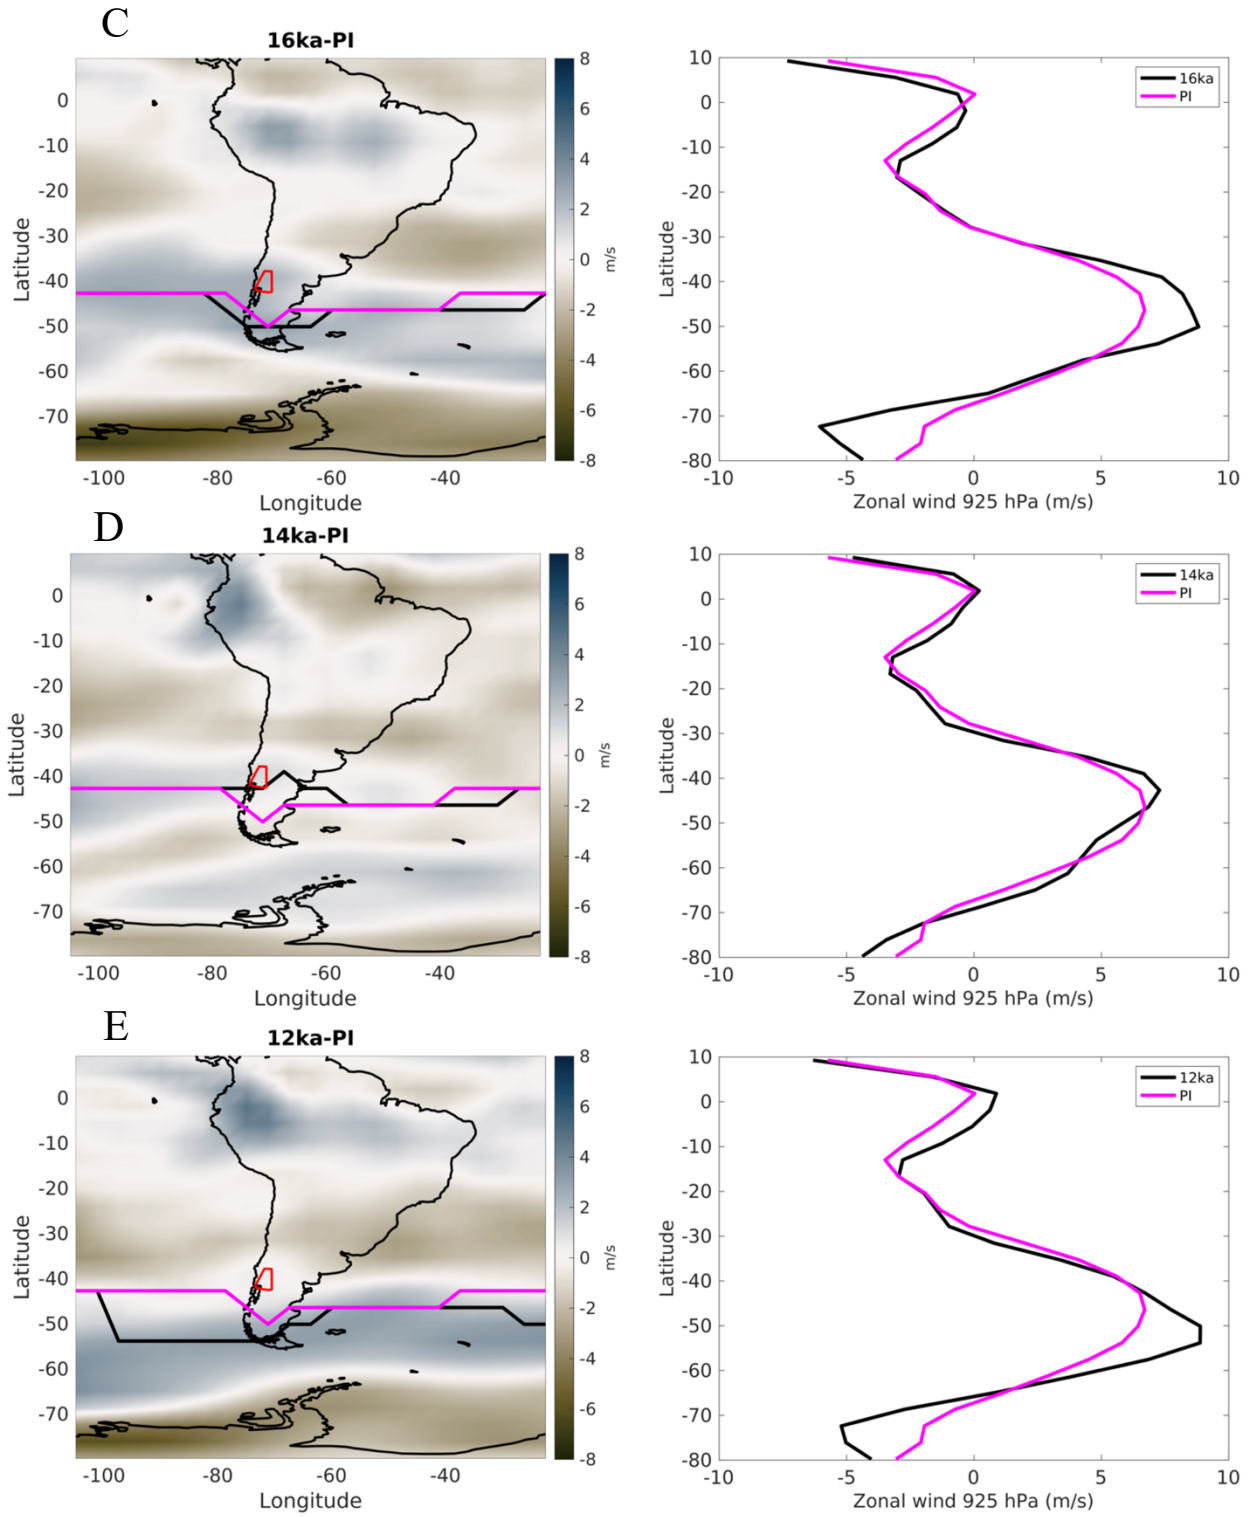

144  
 145  
 146  
 147  
 148  
 149  
 150

151 **850 hPa Moisture Flux Convergence**

152

153

154 We calculate the moisture flux convergence (MFC) at 850 hPa as:

155

156

157

$$-1(\nabla \cdot Vq)$$

158

159 where  $\nabla$  is the gradient operator,  $V$  is the horizontal wind vector (u,v), and  $q$  is the specific

160 humidity. The divergence is multiplied in this case by -1 to show moisture flux convergence. We

161 calculate the MFC at the **LGM** (22ka-21.5ka), **18ka** (18.5ka-18ka), **16ka** (16.5ka-16ka), **14ka**

162 (14.5ka-14ka), and **12ka** (12.5ka-12ka) and then compute the difference at these periods against

163 the **PI** (shown below in Figure S4A-E).

164

165

166

167

168

169

170

171

172

173

174

175

176

177

178

179

180

181

182

183

184

185

186

187

188

189

190

191

192

193

194

195

196 **Figure S4 A-E.** JJA moisture flux convergence at 850 hPa for each corresponding time period,  
197 computed as the difference from the PI (in  $\text{g kg}^{-1}\text{s}^{-1}$ ). Positive anomalies indicate areas of greater  
198 moisture flux convergence relative to the PI and negative values indicate areas of greater moisture  
199 flux divergence relative to the PI. The wind vectors correspond to the anomaly relative to the PI  
200 for the 850 hPa. The red polygon denotes the location of our model domain. Time periods listed  
201 are computed over 500 yr periods (*LGM*: 22ka-21.5ka; *18ka*: 18.5ka-18ka; *16ka*: 16.5ka-16ka;  
202 *14ka*: 14.5ka-14ka; *12ka*: 12.5ka-12ka).  
203

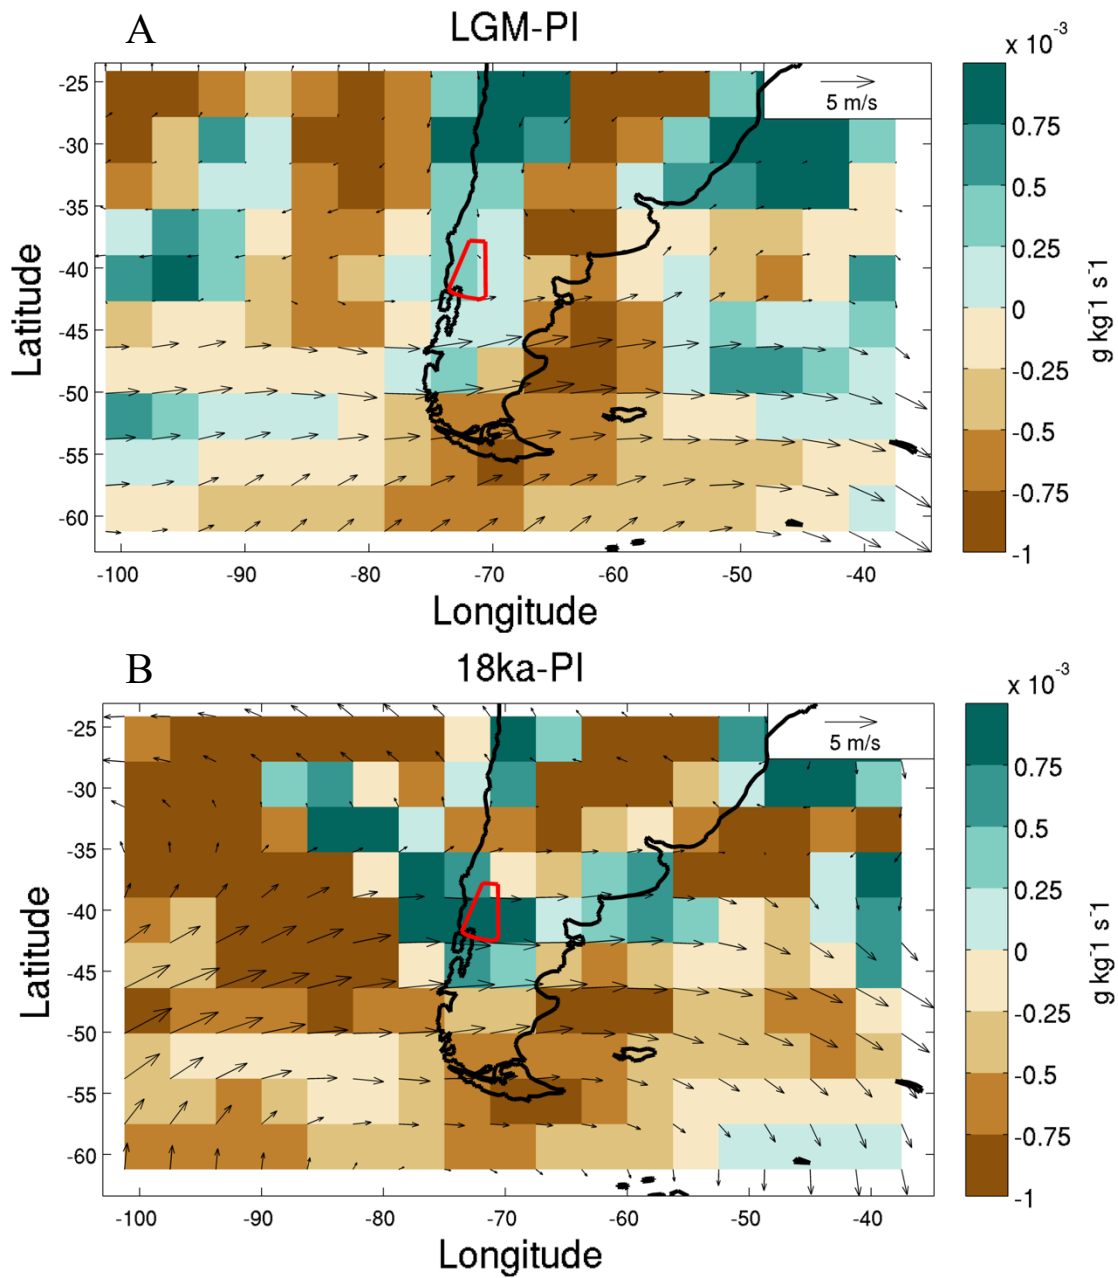

204  
205

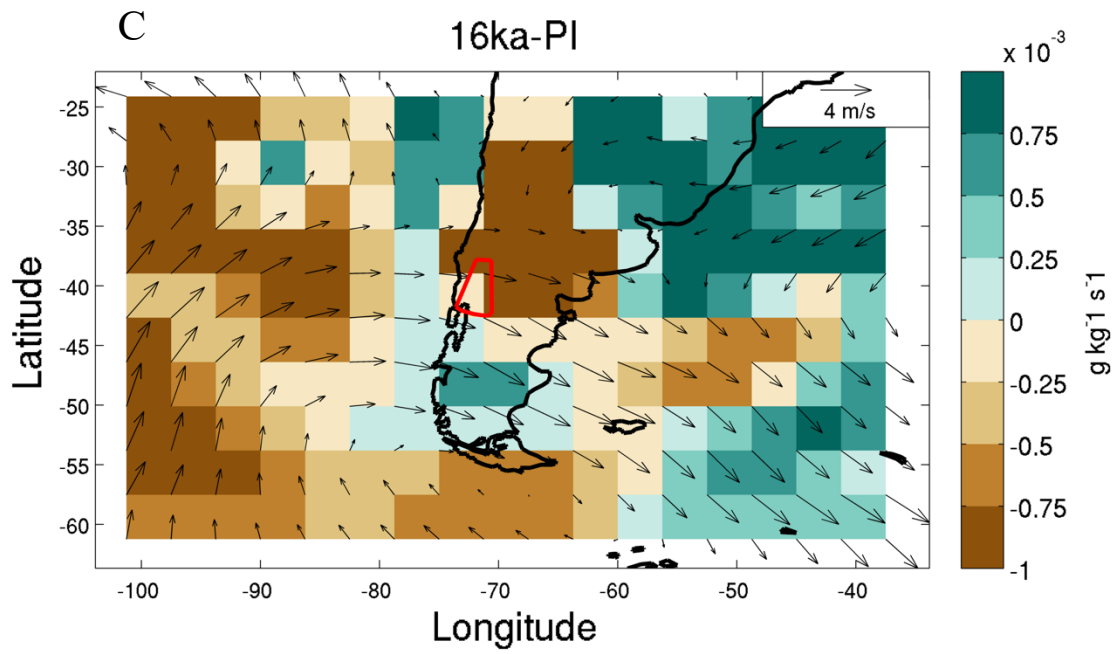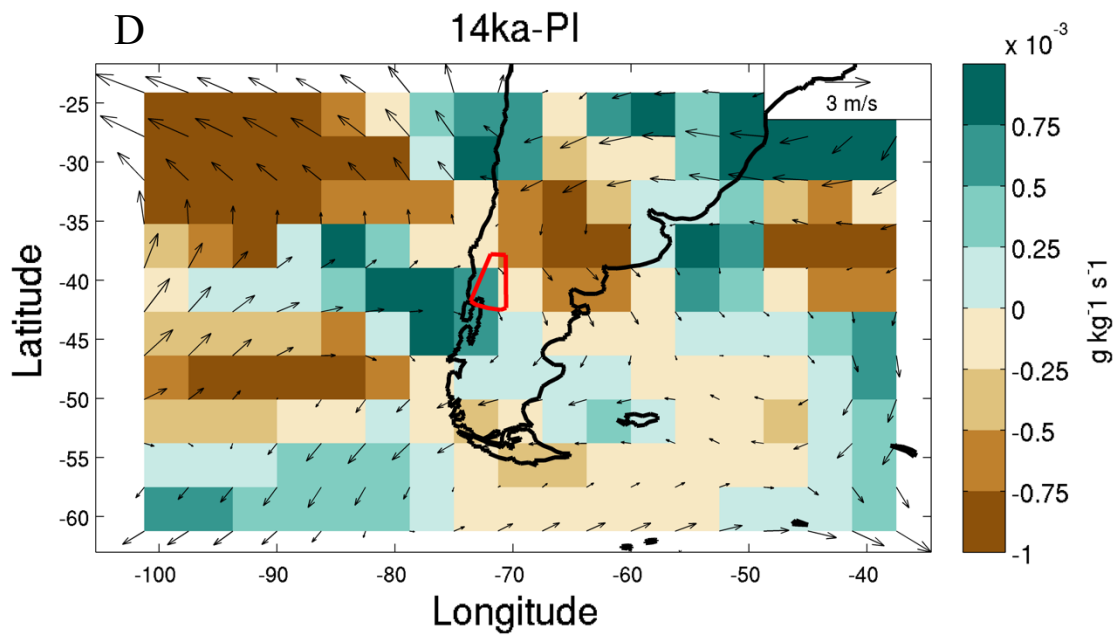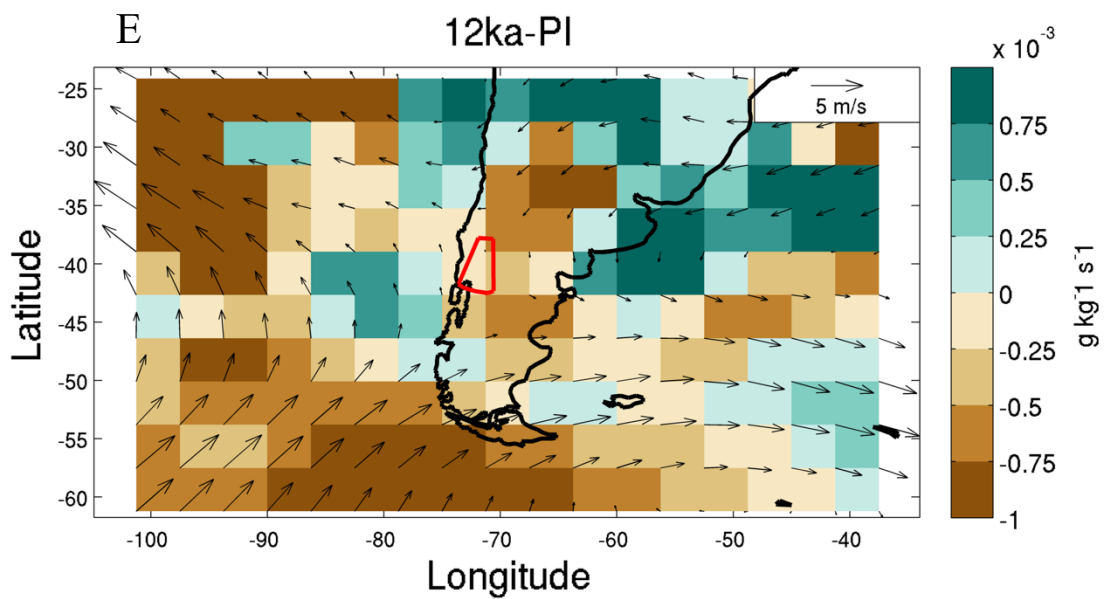



207 **References**

- 208 Aschwanden, A., Bueler, E., Khroulev, C., and Blatter, H.: An enthalpy formulation for glaciers  
209 and ice sheets, *J. Glaciol.*, 58, 441–457, <https://doi.org/10.3189/2012JoG11J088>, 2012.
- 210 Darvill, C.M., Stokes, C.R., Bentley, M.J., Evans, D.J.A., Lovell, H. Dynamics of former ice  
211 lobes of the southernmost Patagonian Ice Sheet based on a glacial landsystems approach.  
212 *Journal of Quaternary Science*. 32,6,857-876. <https://doi.org/10.1002/jqs.2890>
- 213 Goelzer, H., Nowicki, S., Payne, A., Larour, E., Seroussi, H., Lipscomb, W. H., Gregory, J., Abe-  
214 Ouchi, A., Shepherd, A., Simon, E., Agosta, C., Alexander, P., Aschwanden, A., Barthel, A.,  
215 Calov, R., Chambers, C., Choi, Y., Cuzzzone, J., Dumas, C., Edwards, T., Felikson, D., Fettweis,  
216 X., Golledge, N. R., Greve, R., Humbert, A., Huybrechts, P., Le clec'h, S., Lee, V., Leguy, G.,  
217 Little, C., Lowry, D. P., Morlighem, M., Nias, I., Quiquet, A., Rückamp, M., Schlegel, N.-J.,  
218 Slater, D. A., Smith, R. S., Straneo, F., Tarasov, L., van de Wal, R., and van den Broeke, M.: The  
219 future sea-level contribution of the Greenland ice sheet: a multi-model ensemble study of  
220 ISMIP6, *The Cryosphere*, 14, 3071–3096, <https://doi.org/10.5194/tc-14-3071-2020>, 2020.
- 221 Hamza, V. M. and Vieira, F.: Global heat flow: new estimates using digital maps and GIS  
222 techniques, *International Journal of Terrestrial Heat Flow and Applied Geothermics*, 1, 6–13,  
223 <https://doi.org/10.31214/ijthfa.v1i1.6>, 2018
- 224 MacGregor, J. A., Fahnestock, M. A., Catania, G. A., Aschwanden, A., Clow, G. D., Colgan, W.  
225 T., Gogineni, S. P., Morlighem, M., Nowicki, S. M., Paden, J. D., and Price, S. F.: A synthesis of  
226 the basal thermal state of the Greenland Ice Sheet, *J. Geophys. Res.-Earth*, 121, 1328–1350,  
227 2016.
- 228 Seroussi, H., Nowicki, S., Payne, A. J., Goelzer, H., Lipscomb, W. H., Abe-Ouchi, A., Agosta,  
229 C., Albrecht, T., Asay-Davis, X., Barthel, A., Calov, R., Cullather, R., Dumas, C., Galton-Fenzi,  
230 B. K., Gladstone, R., Golledge, N. R., Gregory, J. M., Greve, R., Hattermann, T., Hoffman, M. J.,  
231 Humbert, A., Huybrechts, P., Jourdain, N. C., Kleiner, T., Larour, E., Leguy, G. R., Lowry, D. P.,  
232 Little, C. M., Morlighem, M., Pattyn, F., Pelle, T., Price, S. F., Quiquet, A., Reese, R., Schlegel,  
233 N.-J., Shepherd, A., Simon, E., Smith, R. S., Straneo, F., Sun, S., Trusel, L. D., Van Breedam, J.,  
234 van de Wal, R. S. W., Winkelmann, R., Zhao, C., Zhang, T., and Zwinger, T.: ISMIP6 Antarctica:  
235 a multi-model ensemble of the Antarctic ice sheet evolution over the 21st century, *The*  
236 *Cryosphere*, 14, 3033–3070, <https://doi.org/10.5194/tc-14-3033-2020>, 2020.
- 237 Seroussi, H., Morlighem, M., Rignot, E., Khazendar, A., Larour, E., & Mouginot, J. (2013).  
238 Dependence of century-scale projections of the Greenland ice sheet on its thermal regime.  
239 *Journal of Glaciology*, 59(218), 1024–1034. <https://doi.org/10.3189/2013JoG13J054>

240
